# Supplementary material
Source: publisher figshare collection journal article supplement (https://gsajournals.figshare.com/ndownloader/files/18900881)
Supplement: Supplementary file 1 [file 18900881]

## Sheet: Sheet1
Table S7. SRA numbers of yeast strain data used for re-analysis
STD_name	Isolate Name	SRA number	Aneuploidies (1002 Genomes)
AAA	RM11-1a	ERR1309487	euploid
AAC	CBS2165a	ERR1309038	euploid
ABS	DBVPG3591_1b	ERR1309033	euploid
ACK	Y12_1b	ERR1308893	euploid
ACQ	CLIB219_2b	ERR1308618	euploid
ACV	WE372_1b	ERR1308596	aneu;+1*1;
ADA	Y55_1b	ERR1309427	euploid
AEF	CBS6414	ERR1308873	euploid
AEQ	CBS1782	ERR1309512	euploid
AES	CBS4054	ERR1309368	aneu;+1*2;
AFC	CBS7764	ERR1309327	aneu;+1*7;-1*14;
AFG	CBS1387	ERR1309145	euploid
AGC_1	CBS2444	ERR1309000	aneu;+1*1;+1*5;+1*10;+1*11;
AHG	CBS1586	ERR1308781	euploid
AHQ	CBS440	ERR1309019	euploid
AHR	CBS1227	ERR1308770	euploid
ANV	RIB0004	ERR1308740	aneu;+1*1;+1*8;
ARL	CBS2087	ERR1309170	aneu;+1*1;
BGD	CLIB552	ERR1309432	euploid
BII	DBVPG1106	ERR1308846	euploid
CEB	DBVPG1619-4B	ERR1309017	euploid
CEK	JCM_2985-4B	ERR1309167	euploid
CER	N34:2-4(a)	ERR1308780	euploid
CEV	IFO_0289:4-3(b)	ERR1308745	euploid
CMF	RIB6001	ERR1308700	aneu;+1*3;
SACE_GAL	SK1	ERR023701	euploid
SACE_GAS	UWOPS83-787_3	ERR049929	euploid
SACE_GAV	W303	ERR023702	euploid
